# Supplementary material for: Mechanistic studies on the reactivity of sensitizing allylic hydroperoxides: investigation of the covalent modification of amino acids by carbon-radical intermediates
Source: Royal Society of Chemistry journal article supplement (doi:10.1039/c3tx50109d), 2014-01-01

## SUPPLEMENTARY INFORMATION

### **Mechanistic studies on the reactivity of sensitizing allylic hydroperoxides: investigation on the covalent modification of amino acids by carbon-radical intermediates**

Dany Kao,<sup>a</sup> Alain Chaintreau,<sup>b</sup> Jean-Pierre Lepoittevin<sup>a</sup> and Elena Giménez-Arnau<sup>\*a</sup>

<sup>a</sup> *Laboratoire de Dermatochimie, Institut de Chimie de Strasbourg (CNRS UMR 7177), Université de Strasbourg, 4 Rue Blaise Pascal, 67081 Strasbourg, France. E-mail: egimenez@unistra.fr*

<sup>b</sup> *Firmenich SA, Corporate R&D Division, 1 Route des Jeunes, 1211 Geneva 8, Switzerland*

#### **Table of contents**

NMR data compounds **5**, **6a/6b**

Reaction **4**/*N*-Ac-Cys-OMe

ESI-MS/MS analysis of *m/z* 346 and *m/z* 364

Reaction **3**/*N*-Ac-Lys-OMe/FeSO<sub>4</sub>

LC chromatogram of the crude product

Reaction **3**/*N*-Ac-Tyr-OEt/FeCl<sub>3</sub>

LC chromatogram of the reaction and suggested adduct **30**

## NMR data compounds 5, 6a/6b

In the presence of FeCl<sub>3</sub>, two fractions of new compounds could be isolated from the crude product by column chromatography on silica gel (acetone/pentane 1:9, acetone/pentane 2:8) and analyzed by NMR. One corresponded to the cysteine disulfide dimer **5**, resulting from its oxidation. HSQC experiments showed two protons at 3.19 ppm correlated to a carbon atom at 40.7 ppm,  $\delta$  characteristic of the -CH<sub>2</sub> in position  $\alpha$  to the disulfide bond. NMR analysis of the second fraction suggested the formation of two diastereomers. HSQC data revealed carbon atoms at 110.5/110.1 ppm, directly correlated to protons at 4.74/4.78 ppm, proving that the vinyl group of **3** had been preserved during the reaction. HMBC experiments showed long-range correlations between protons at 4.74/4.78 ppm and a carbon atom at 20.5 ppm bearing protons at 1.71/1.74 ppm, corroborating the existence of the isoprenyl group. HSQC and HMBC data also highlighted a correlation between a carbon atom at 125.5 ppm and a proton at 5.53 ppm, this one long-range correlated with a methyl group at 21.0/1.76 ppm and a carbon atom at 68.5 ppm with an associated proton at 3.98 ppm. These  $\delta$  suggested the replacement of the initial hydroperoxide methylallyl group of **3** by a secondary alcohol methylallyl function, confirming the preservation of the menthene ring. Finally, both diastereomers had a *N*-Ac-Cys-OMe unit linked as the characteristic  $\delta$  of the -CH<sub>2</sub> in position  $\alpha$  to the thiol group of the side-chain at 27.2 ppm shifted to 34.9 ppm with protons at 2.96/3.10 ppm. The whole NMR information agreed with regioisomers **6a** and **6b**, for which two diastereomers are possible.

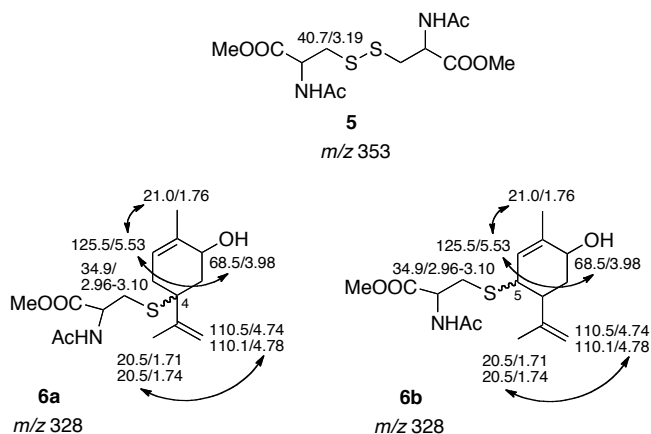

Combination of NMR (HSQC direct and HMBC long-range correlations) and MS data suggesting structures **5** and **6a/6b**.

NMR data did not allow distinguishing between regioisomers **6a** and **6b**. Theoretically, <sup>1</sup>H and <sup>13</sup>C NMR chemical shifts of the isoprenyl group and of the sulphur atom fixing position should be slightly different. However, no significant signal was observed discriminating between both derivatives.

### <sup>1</sup>H NMR simulation

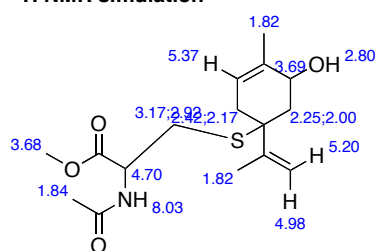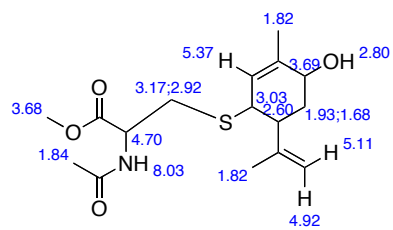

### <sup>13</sup>C NMR simulation

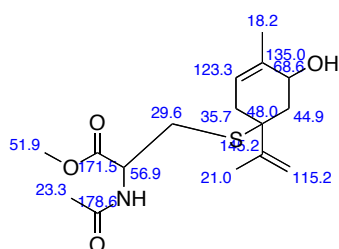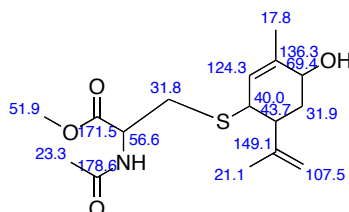

Simulation of NMR chemical shifts of **6a** and **6b** (CS Chem Draw Ultra software, version 12.0)

## Reaction 4/*N*-Ac-Cys-OMe

(a) ESI-MS/MS analysis of *m/z* 346; (b) ESI-MS/MS analysis of *m/z* 364

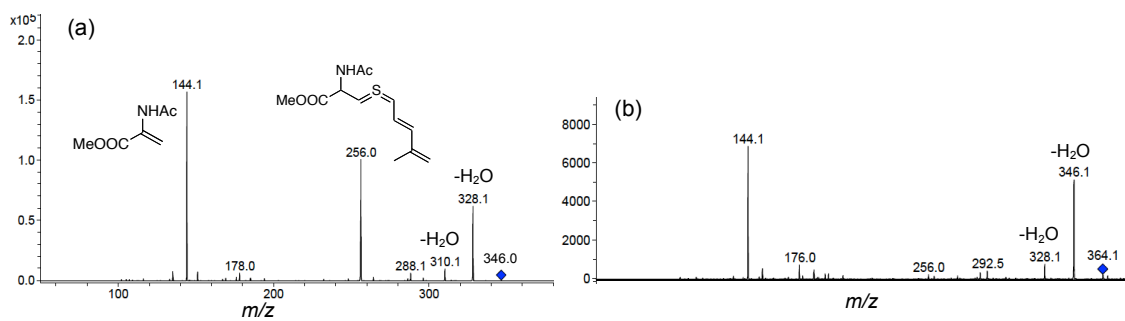

## Reaction 3/*N*-Ac-Lys-OMe/ $\text{FeSO}_4$

LC chromatogram of the crude product

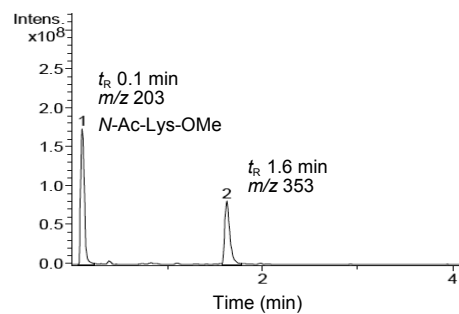

### Reaction 3/*N*-Ac-Tyr-OEt/ $\text{FeCl}_3$

LC chromatogram of the reaction and suggested adduct **30**

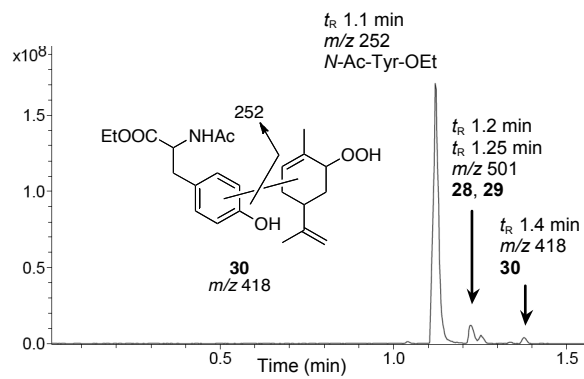

Supplement: c3tx50109d1.pdf [file c3tx50109d1.pdf]
